# Supplementary material for: LncRNA RP3-525N10.2-NFKB1-PROS1 triplet-mediated low PROS1 expression is an onco-immunological biomarker in low-grade gliomas: a pan-cancer analysis with experimental verification
Source: Springer Nature journal article supplement (doi:10.1186/s12967-022-03536-y), 2022-07-25
Supplement: MOESM1 [file 23301804]

Table S1. The association between PROS1 expression and clinicopathological characteristic

| Characteristic                 | levels                    | Low expression of PROS1 | High expression of PROS1 | p              | Test        |
|--------------------------------|---------------------------|-------------------------|--------------------------|----------------|-------------|
| n                              |                           | 255                     | 255                      |                |             |
| WHO grade, n (%)               | G2                        | 125 (27.6%)             | 91 (20.1%)               | <b>7.1e-07</b> | Chisq.test  |
|                                | G3                        | 101 (22.3%)             | 136 (30%)                |                |             |
| IDH status, n (%)              | WT                        | 33 (6.5%)               | 61 (12%)                 | <b>7.2e-06</b> | Chisq.test  |
|                                | Mut                       | 220 (43.4%)             | 193 (38.1%)              |                |             |
| 1p/19q codeletion, n (%)       | codel                     | 88 (17.3%)              | 80 (15.7%)               | 0.15           | Chisq.test  |
|                                | non-codel                 | 167 (32.7%)             | 175 (34.3%)              |                |             |
| Primary therapy outcome, n (%) | PD                        | 42 (9.5%)               | 59 (13.4%)               | 0.03           | Chisq.test  |
|                                | SD                        | 73 (16.6%)              | 70 (15.9%)               |                |             |
|                                | PR                        | 30 (6.8%)               | 32 (7.3%)                |                |             |
|                                | CR                        | 78 (17.7%)              | 56 (12.7%)               |                |             |
| Gender, n (%)                  | Female                    | 111 (21.8%)             | 117 (22.9%)              | 0.656          | Chisq.test  |
|                                | Male                      | 144 (28.2%)             | 138 (27.1%)              |                |             |
| Race, n (%)                    | Asian                     | 4 (0.8%)                | 4 (0.8%)                 | 1.000          | Fisher.test |
|                                | Black or African American | 11 (2.2%)               | 10 (2%)                  |                |             |
|                                | White                     | 238 (47.7%)             | 232 (46.5%)              |                |             |
| Age, n (%)                     | <=40                      | 140 (27.5%)             | 112 (22%)                | <b>0.067</b>   | Chisq.test  |
|                                | >40                       | 115 (22.5%)             | 143 (28%)                |                |             |
| Histological type, n (%)       | Astrocytoma               | 83 (16.3%)              | 109 (21.4%)              | 0.02           | Chisq.test  |
|                                | Oligoastrocytoma          | 68 (13.3%)              | 60 (11.8%)               |                |             |

| Characteristic    | levels            | Low expression of PROS1 | High expression of PROS1 | p              | Test         |
|-------------------|-------------------|-------------------------|--------------------------|----------------|--------------|
|                   | Oligodendroglioma | 104 (20.4%)             | 86 (16.9%)               |                |              |
| Laterality, n (%) | Left              | 134 (26.5%)             | 114 (22.6%)              | 0.144          | Fisher.t est |
|                   | Midline           | 2 (0.4%)                | 4 (0.8%)                 |                |              |
|                   | Right             | 116 (23%)               | 135 (26.7%)              |                |              |
| OS event, n (%)   | Alive             | 205 (40.2%)             | 180 (35.3%)              | <b>2.6e-03</b> | Chisq.te st  |
|                   | Dead              | 50 (9.8%)               | 75 (14.7%)               |                |              |
| DSS event, n (%)  | Alive             | 207 (41.2%)             | 182 (36.3%)              | <b>3e-03</b>   | Chisq.te st  |
|                   | Dead              | 44 (8.8%)               | 69 (13.7%)               |                |              |
| PFI event, n (%)  | Alive             | 166 (32.5%)             | 152 (29.8%)              | 0.03           | Chisq.te st  |
|                   | Dead              | 89 (17.5%)              | 103 (20.2%)              |                |              |
| Age, median (IQR) |                   | 39 (31, 52)             | 43 (33, 54)              | <b>0.026</b>   | Wilcoxo n    |

Table S2. PROS1 expression association with clinical pathological characteristics (logistic regression).

| Characteristics                                                        | Total(N) | Odds Ratio(OR)             | P value      |
|------------------------------------------------------------------------|----------|----------------------------|--------------|
| WHO grade (G3 vs. G2)                                                  | 453      | <b>1.850 (1.276-2.692)</b> | <b>0.001</b> |
| 1p/19q codeletion (non-codel vs. codel)                                | 510      | 1.153 (0.797-1.670)        | 0.451        |
| IDH status (Mut vs. WT)                                                | 507      | <b>0.475 (0.295-0.751)</b> | <b>0.002</b> |
| Gender (Male vs. Female)                                               | 510      | 0.909 (0.641-1.289)        | 0.593        |
| Age (>40 vs. <=40)                                                     | 510      | <b>1.554 (1.097-2.207)</b> | <b>0.013</b> |
| Histological type (Oligoastrocytoma&Oligodendroglioma vs. Astrocytoma) | 510      | <b>0.646 (0.450-0.926)</b> | <b>0.018</b> |
| Laterality (Midline&Right vs. Left)                                    | 505      | 1.385 (0.976-1.967)        | 0.068        |
| Race (Black or African American&Asian vs. White)                       | 499      | 0.957 (0.447-2.037)        | 0.910        |
| Primary therapy outcome (PR&CR vs. SD&PD)                              | 440      | 0.726 (0.497-1.059)        | 0.097        |

Table S3. Univariate regression and multivariate survival method (Overall Survival) of prognostic covariates LGG patients

| Characteristics                                                      | Total(N) | Univariate analysis   |                  | Multivariate analysis |                  |
|----------------------------------------------------------------------|----------|-----------------------|------------------|-----------------------|------------------|
|                                                                      |          | Hazard ratio (95% CI) | P value          | Hazard ratio (95% CI) | P value          |
| PROS1                                                                | 509      | 1.548 (1.260-1.903)   | <b>&lt;0.001</b> | 1.297 (1.028-1.636)   | <b>0.028</b>     |
| WHO grade(G2 vs G3)                                                  | 452      | 3.059 (2.046-4.573)   | <b>&lt;0.001</b> | 2.231 (1.385-3.595)   | <b>&lt;0.001</b> |
| Age(<=40 vs >40)                                                     | 509      | 2.889 (2.009-4.155)   | <b>&lt;0.001</b> | 2.755 (1.834-4.139)   | <b>&lt;0.001</b> |
| Gender (Female vs Male)                                              | 509      | 1.124 (0.800-1.580)   | 0.499            | 1.013 (0.736-1.350)   | 0.579            |
| IDH status(Mut vs WT)                                                | 506      | 5.385 (3.777-7.679)   | <b>&lt;0.001</b> |                       |                  |
| 1p/19q codeletion(non-codel vs codel)                                | 509      | 2.493 (1.590-3.910)   | <b>&lt;0.001</b> |                       |                  |
| Primary therapy outcome(PR&CR vs PD&SD)                              | 439      | 4.963 (2.782-8.851)   | <b>&lt;0.001</b> |                       |                  |
| Race(Black or African American&Asian vs White)                       | 498      | 1.178 (0.549-2.529)   | 0.675            |                       |                  |
| Histological type(Astrocytoma vs Oligoastrocytoma&Oligodendroglioma) | 509      | 0.606 (0.430-0.853)   | <b>0.004</b>     |                       |                  |
| Laterality(Left&Right vs Midline)                                    | 504      | 1.203 (0.372-3.886)   | 0.758            |                       |                  |

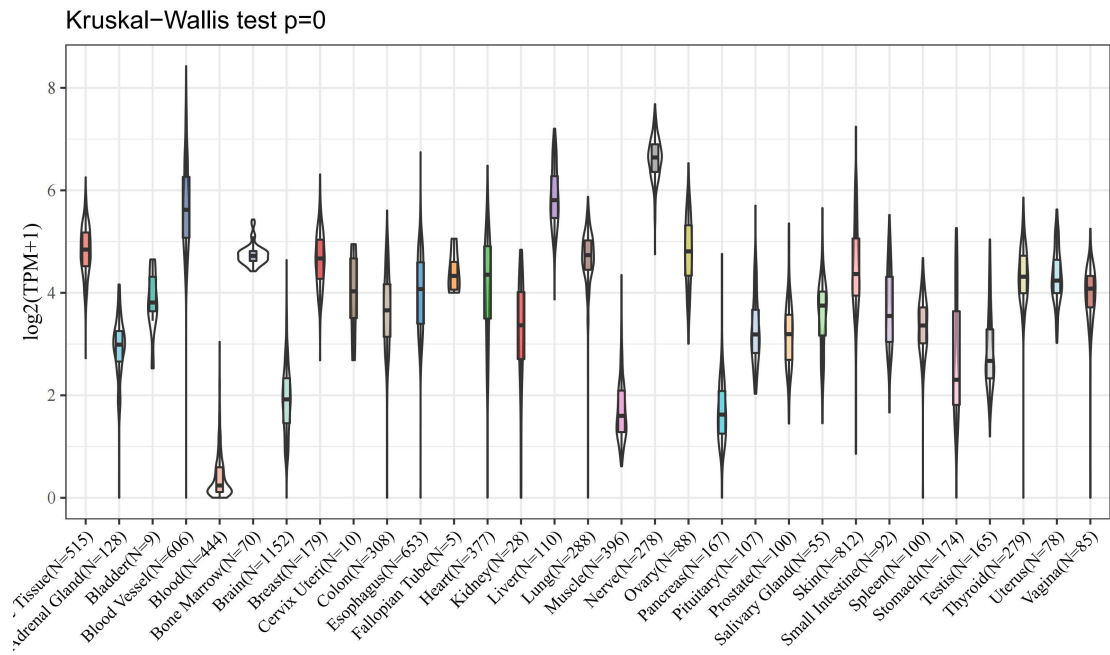

Figure S1. *PROS1* expression in 31 types of tissues using the GTEx dataset

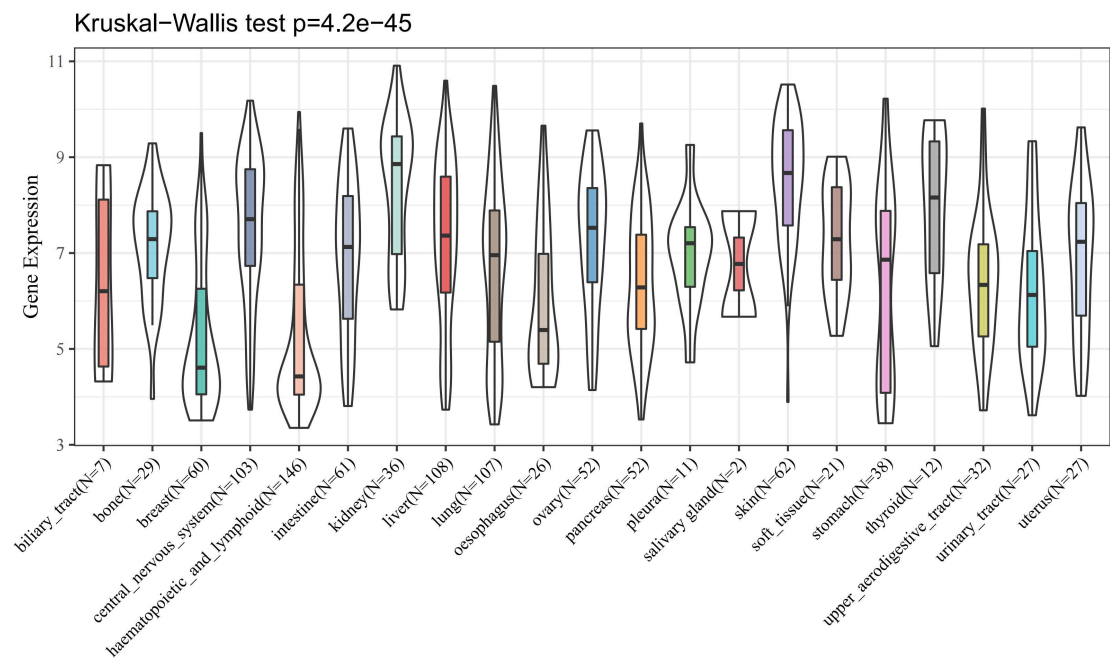

Figure S2. *PROS1* expression in 21 tumour cell lines using the Cancer Cell Line Encyclopedia database

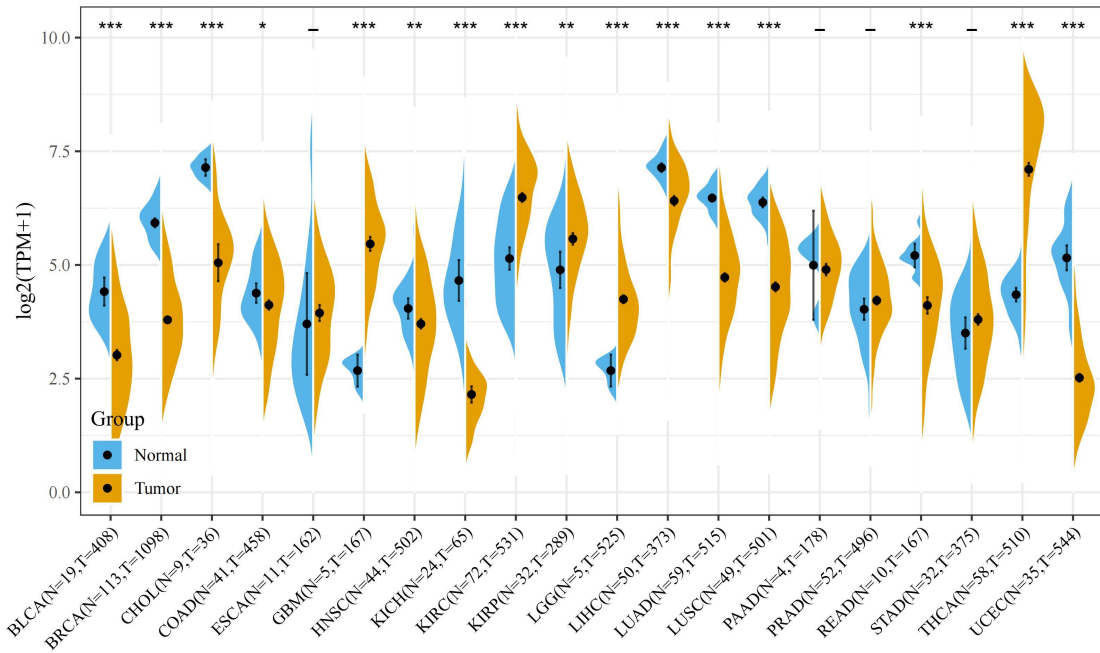

Figure S3. *PROS1* expression between tumour and normal tissues using The Cancer Genome Atlas (TCGA) database

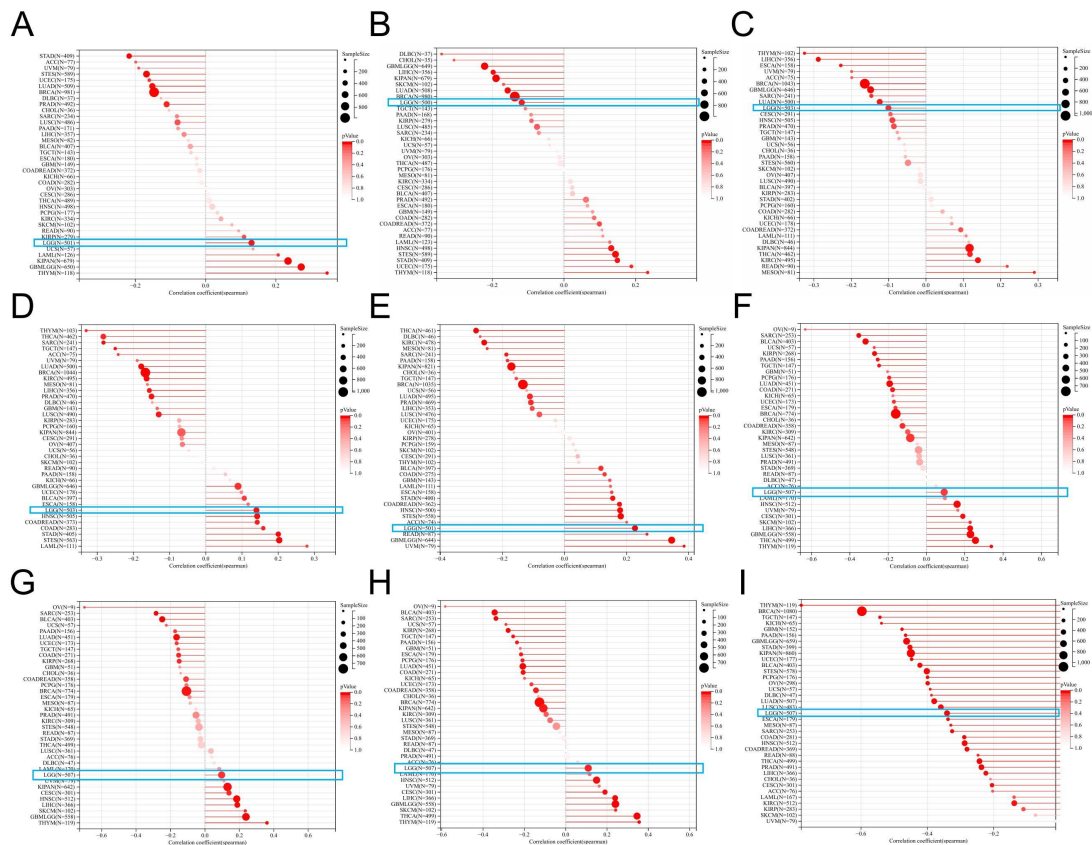

Figure S4. *PROS1* expression is associated with positive result of genomic heterogeneity and cancer stemness. (A) tumour mutational burden (TMB), (B) mutant-allele tumour heterogeneity (MATH), (C) tumour ploidy, (D) homologous recombination deficiency (HRD), (E) loss of heterozygosity (LOH), (F) DNA

methylation-based stemness (DNAss), (G) enhancer elements/DNA methylation-based stemness (ENHss), (H) epigenetically regulated DNA methylation-based stemness (EREG-METHss), and (I) RNA expression-based stemness (RNAss).

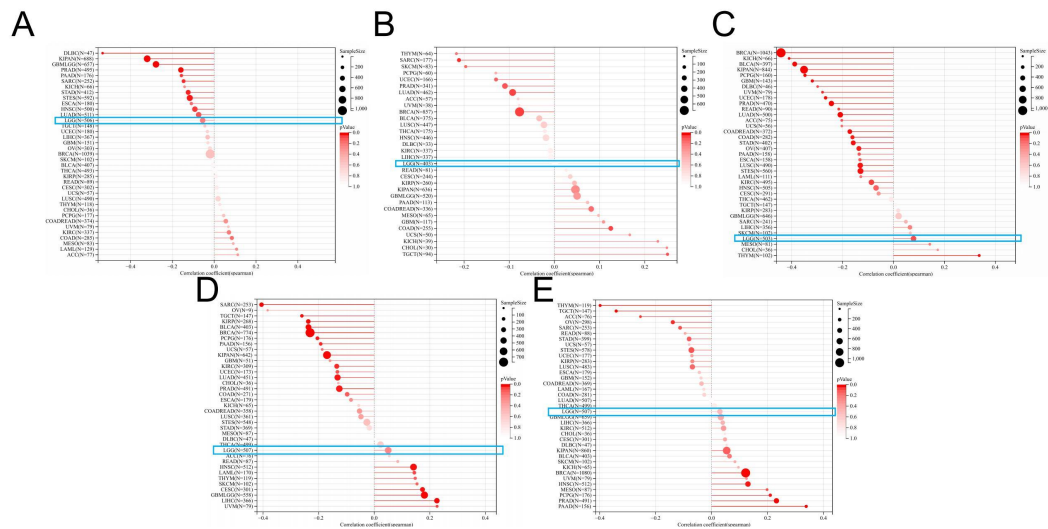

Figure S5. PROS1 expression is associated with negative result of genomic heterogeneity and cancer stemness. (A) microsatellite instability (MSI), (B) neoantigen (NEO), (C) tumour purity, (D) differentially methylated probes-based stemness (DMPss), and (E) epigenetically regulated RNA expression-based stemness (EREG.EXPss).

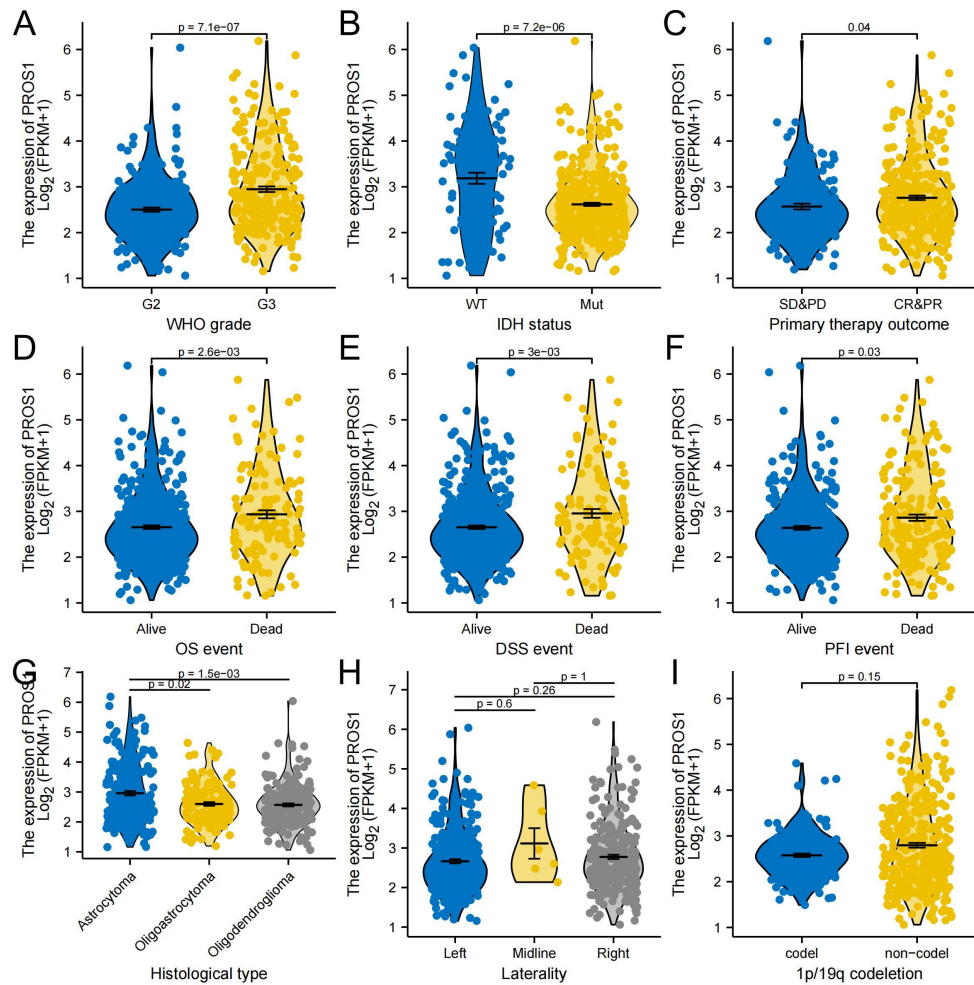

Figure S6. Correlation between PROS1 expression and clinical parameters of patients with LGG. (A) WHO grade, (B) IDH status, (C) primary therapy outcome, (D) overall survival, (E) disease-specific survival, (F) progression-free interval (G) histological type, (H) Laterality, and (I) histological type, 1p/19q codeletion.

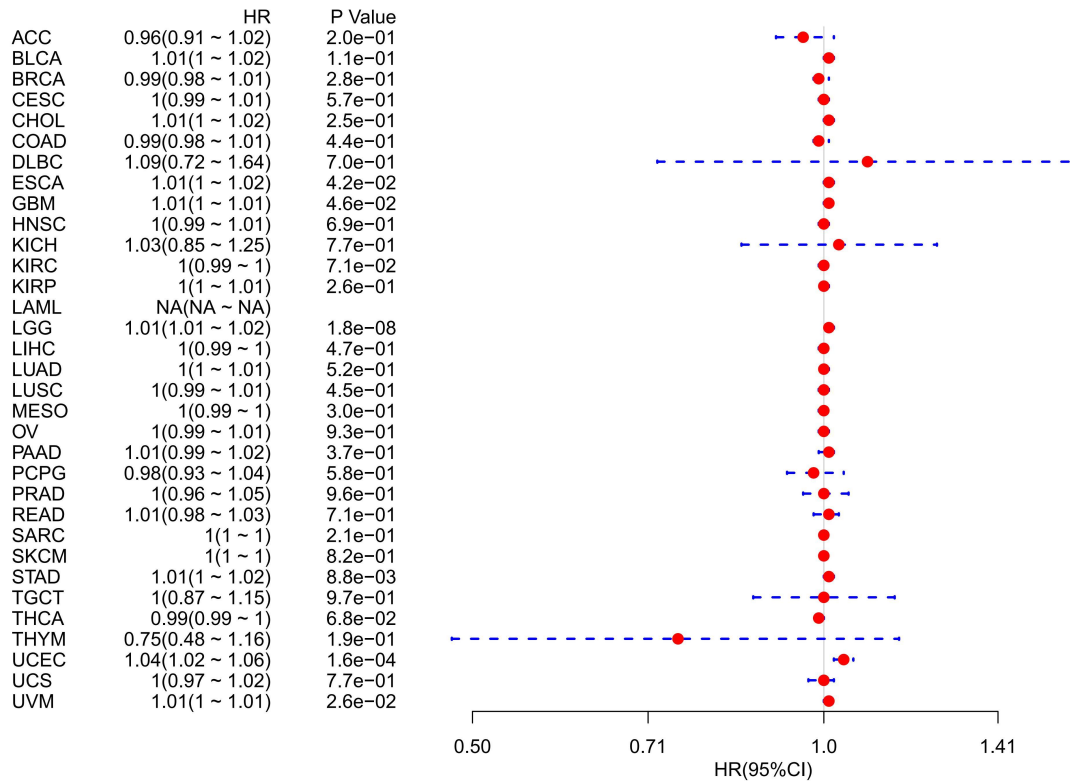

Figure S7. Correlation between PROS1 expression and disease-specific survival in 33 tumours from the TCGA database.

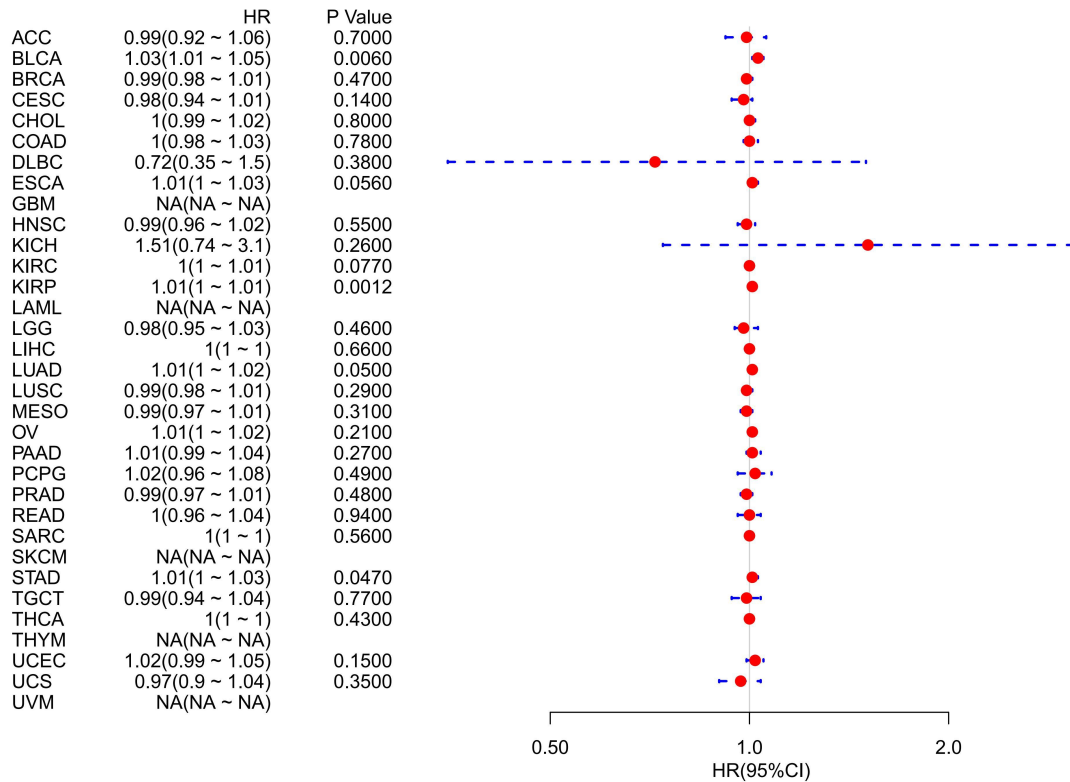

Figure S8. Correlation between PROS1 expression and disease-free interval in 33 tumours from the TCGA database.



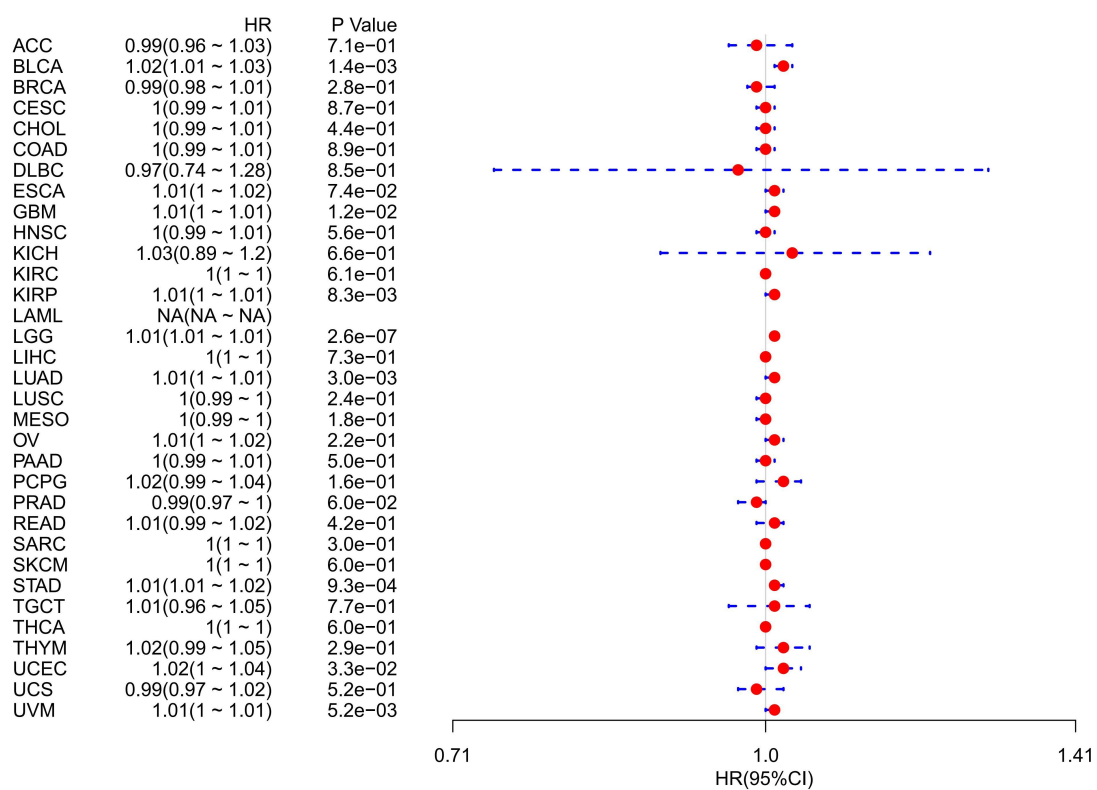

Figure S9. Correlation between PROS1 expression and progression-free interval in 33 tumours from the TCGA database.

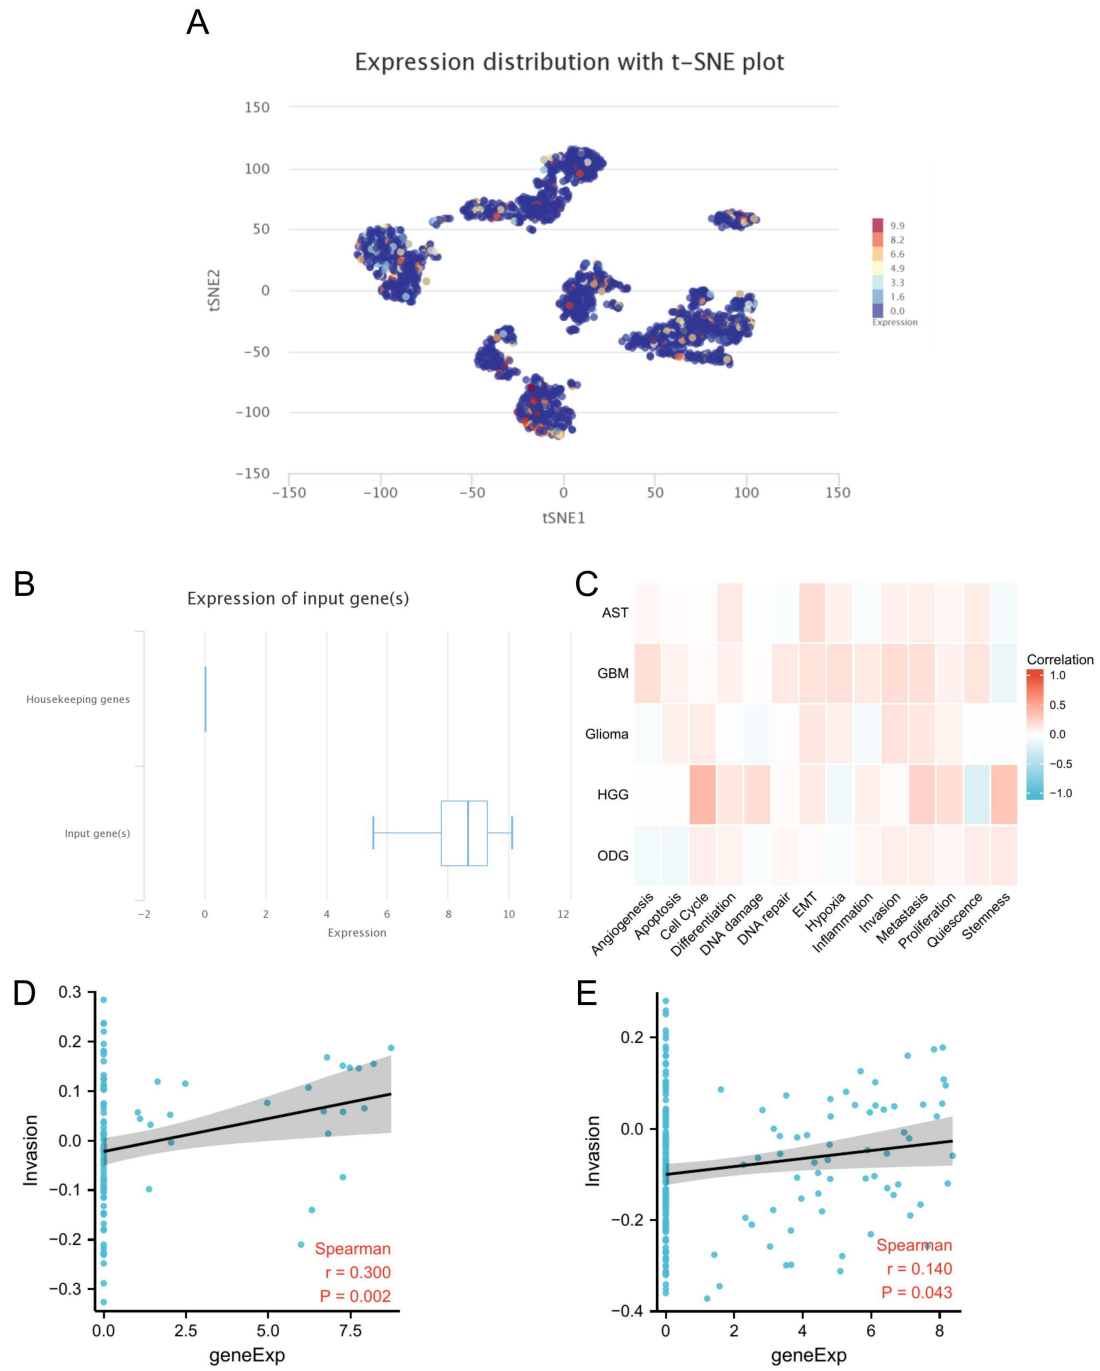

Figure S10. Single-cell analysis of *PROS1* functions in patients with LGG.

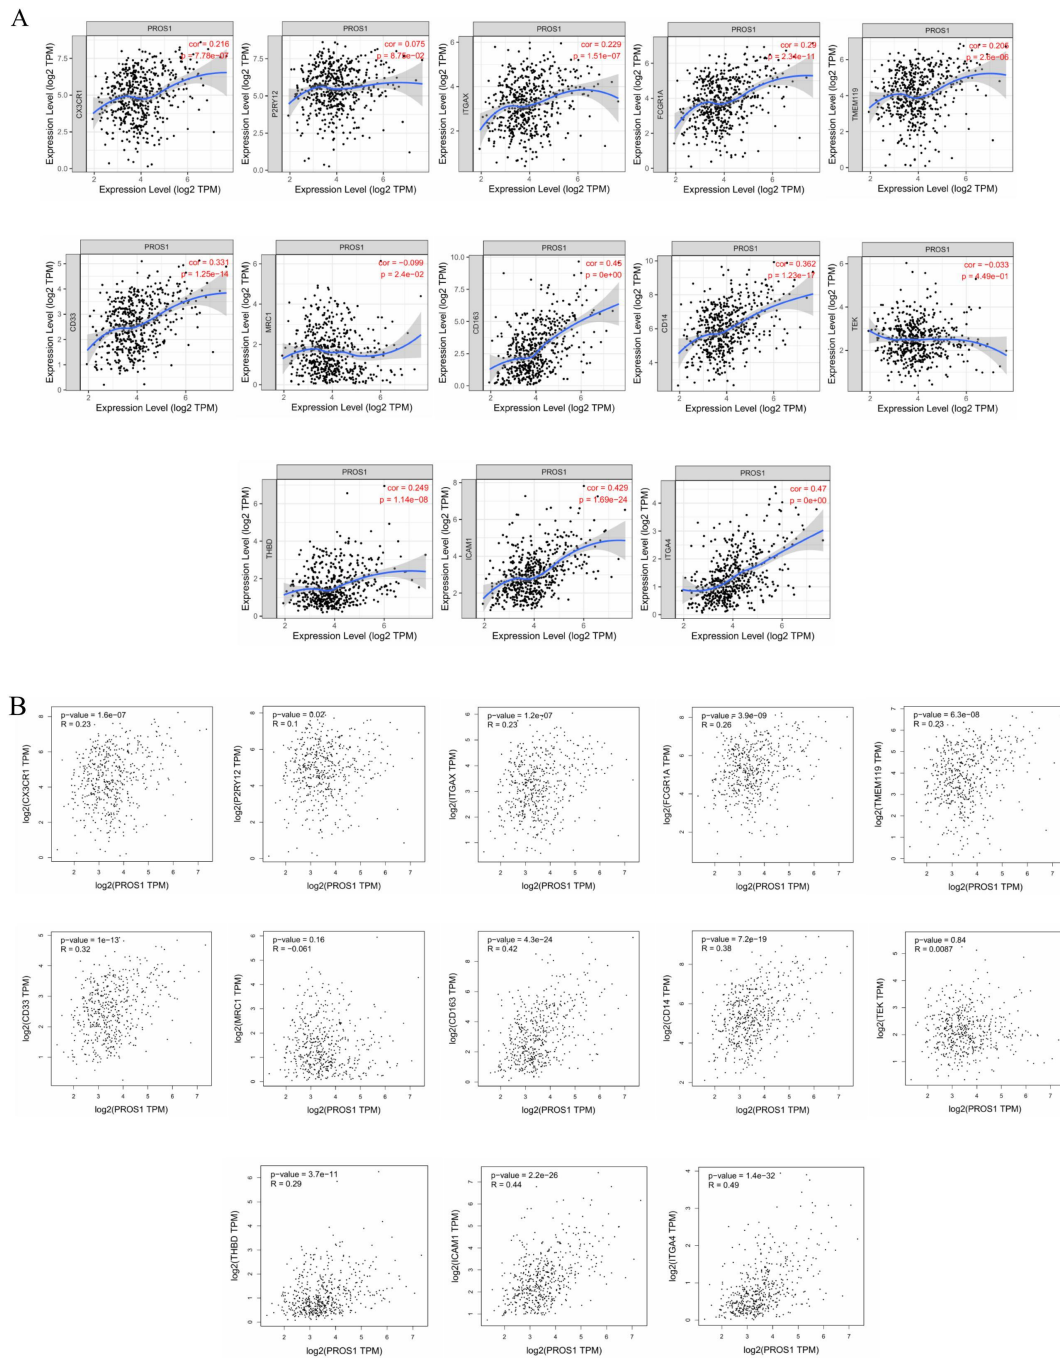

Figure S11. Correlation between PROS1 expression and TAMs immune cell markers in LGG.
